# Supplementary material for: High-temperature proton conductors based on the (110) layered perovskite BaNdScO4
Source: Royal Society of Chemistry journal article supplement (doi:10.1039/d0ta11573h), 2021-01-01
Supplement: d0ta11573h1.pdf [file d0ta11573h1.pdf]

## Electronic Supplementary Information (ESI)

### High-temperature proton conductors based on the (110) layered perovskite BaNdScO<sub>4</sub>

Masahiro Shiraiwa, Takafusa Kido, Kotaro Fujii, Masatomo Yashima\*

Department of Chemistry, School of Science, Tokyo Institute of Technology, 2-12-1-W4-17,  
O-okayama, Meguro-ku, Tokyo 152-8551, Japan

\* Corresponding author

#### (A) Crystal structures of BaNdInO<sub>4</sub> and BaNdScO<sub>4</sub>

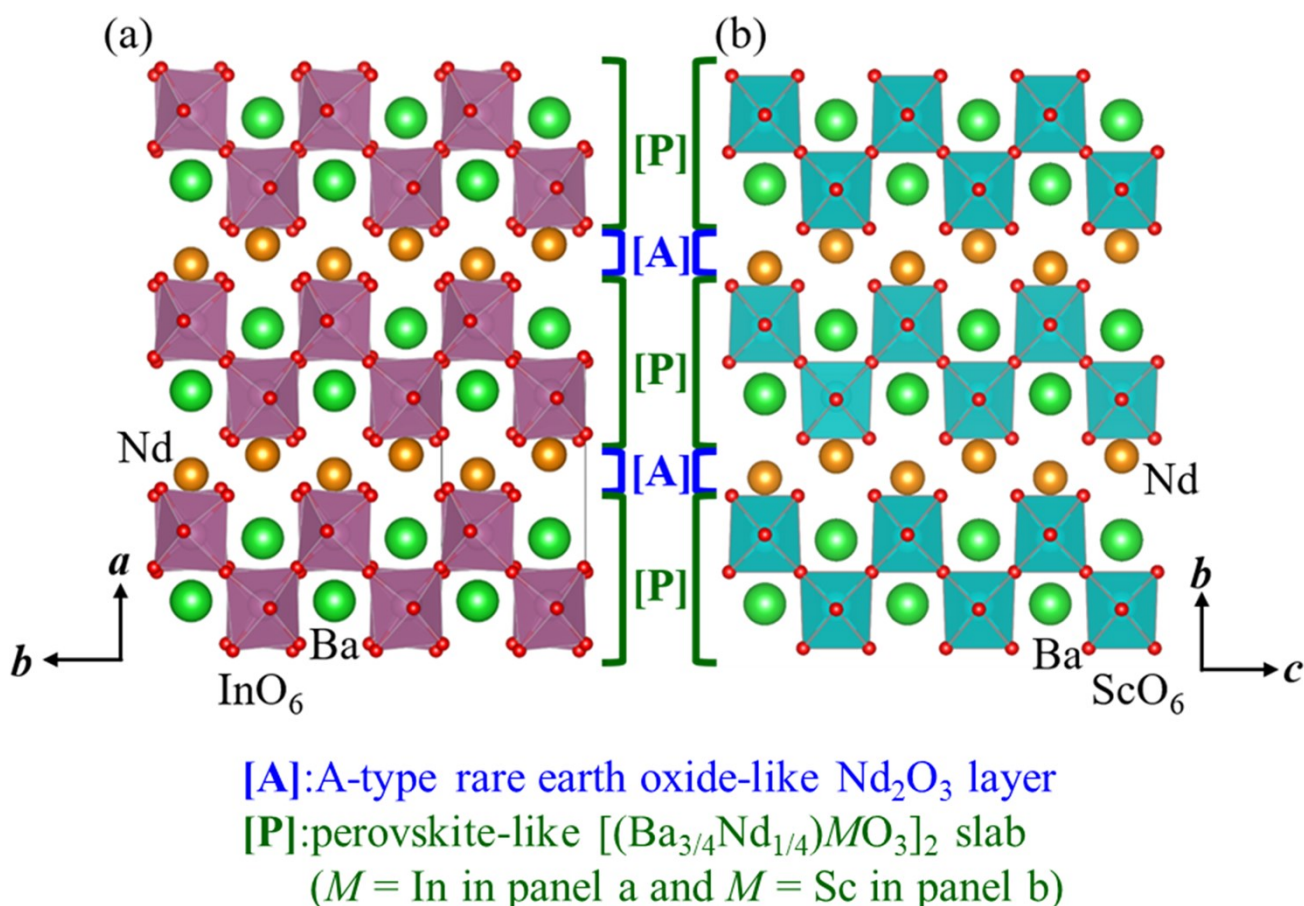

**Figure S1.** Crystal structures of (a) BaNdInO<sub>4</sub> (*Chem. Mater.*, 2014, **26**, 2488–2491) and (b) BaNdScO<sub>4</sub> (*Chem. Commun.*, 2016, **52**, 10980–10983). Red sphere denotes an oxygen atom. (a) BaNdInO<sub>4</sub> with the monoclinic *P2*<sub>1</sub>/*c* BaNdInO<sub>4</sub>-type structure. (b) BaNdScO<sub>4</sub> with the orthorhombic *Cmcm* BaNdInO<sub>4</sub>-type structure.

## (B) XRD patterns of $\text{BaNd}_{1-x}\text{A}_x\text{ScO}_{4-x/2}$

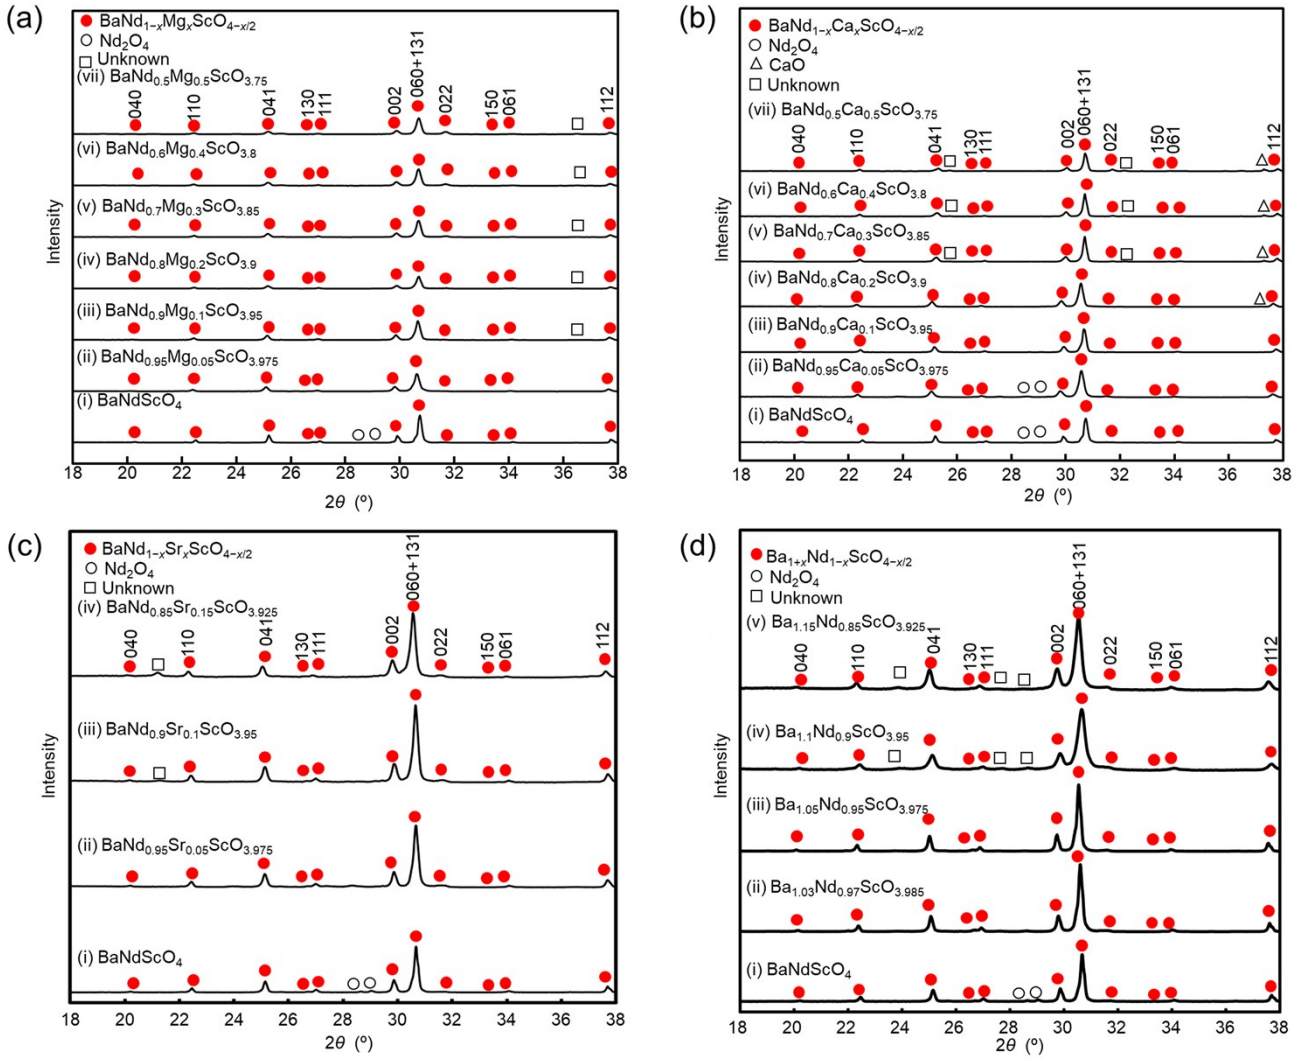

**Figure S2.** Cu K $\alpha$  X-ray powder diffraction patterns of  $\text{BaNd}_{1-x}\text{A}_x\text{ScO}_{4-x/2}$  at room temperature. (a)  $x =$  (i) 0.0, (ii) 0.05, (iii) 0.1, (iv) 0.2, (v) 0.3, (vi) 0.4 and (vii) 0.5 for  $A = \text{Mg}$ . (b)  $x =$  (i) 0.0, (ii) 0.05, (iii) 0.1, (iv) 0.2, (v) 0.3, (vi) 0.4 and (vii) 0.5 for  $A = \text{Ca}$ . (c)  $x =$  (i) 0.0, (ii) 0.05, (iii) 0.1 and (iv) 0.15 for  $A = \text{Sr}$ . (d)  $x =$  (i) 0.0, (ii) 0.03, (iii) 0.05, (iv) 0.1 and (v) 0.15 for  $A = \text{Ba}$ .

### (C) Lattice parameters of $\text{BaNd}_{1-x}\text{Ca}_x\text{ScO}_{4-x/2}$

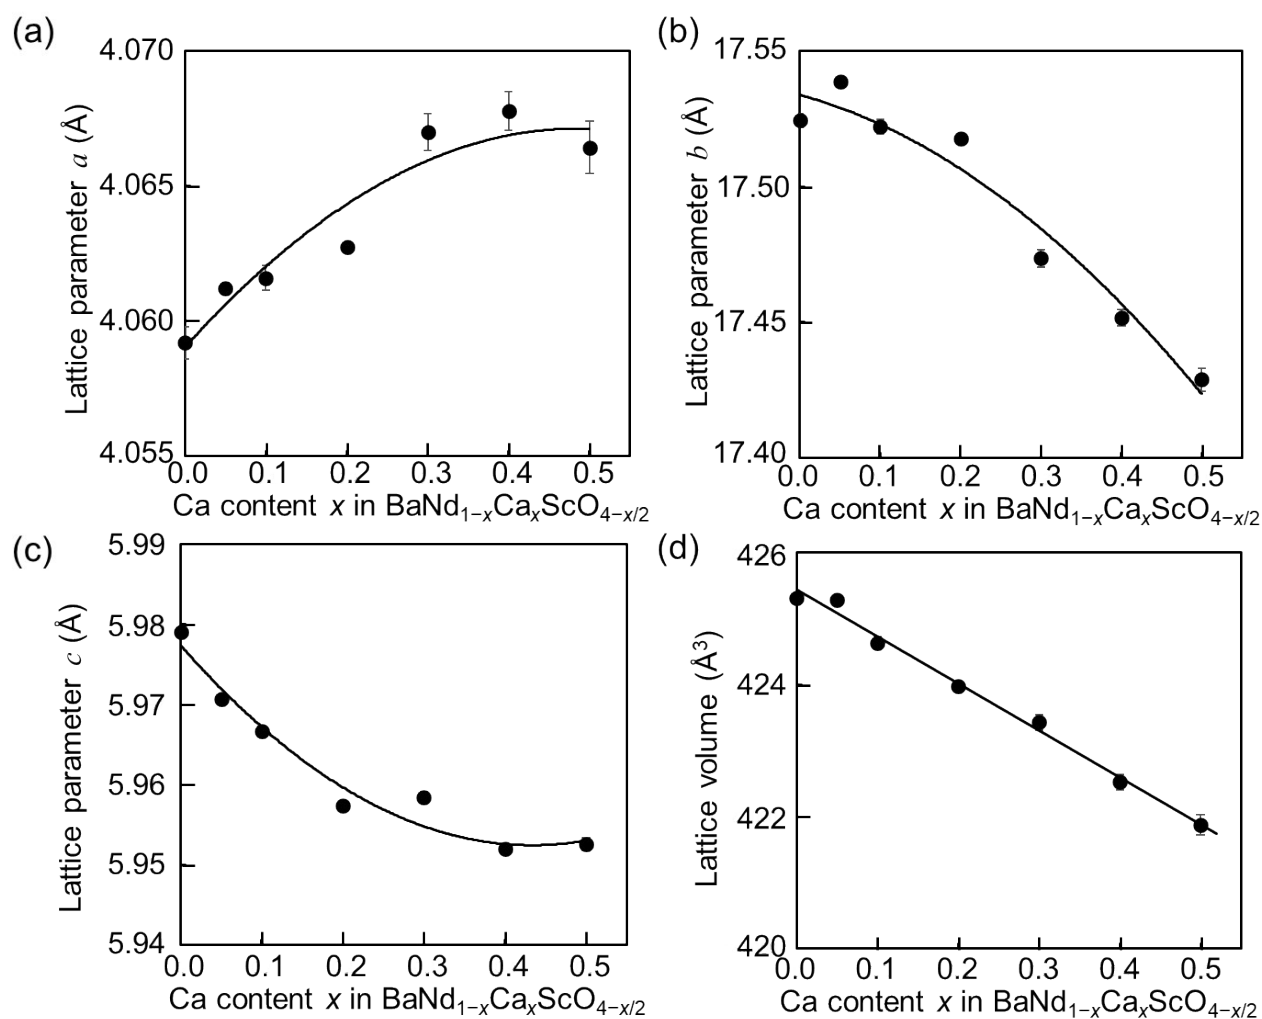

**Figure S3.** Variation of lattice parameters (a)  $a$ , (b)  $b$  and (c)  $c$  and (d) lattice volume of orthorhombic  $Cmcm$   $\text{BaNd}_{1-x}\text{Ca}_x\text{ScO}_{4-x/2}$  with Ca content  $x$  ( $x = 0.0, 0.05, 0.1, 0.2, 0.3, 0.4, 0.5$ ) at 23 °C.

**Table S1.** Lattice parameters and lattice volume of orthorhombic *Cmcm* phase in  $\text{BaNd}_{1-x}\text{Ca}_x\text{ScO}_{4-x/2}$  powders ( $x = 0.0, 0.05, 0.1, 0.2, 0.3, 0.4$  and  $0.5$ ) versus Ca content  $x$  at 23 °C. These parameters of  $\text{BaNd}_{1-x}\text{Ca}_x\text{ScO}_{4-x/2}$  ( $x = 0.0, 0.05, 0.1, 0.2, 0.3, 0.4$  and  $0.5$ ) were determined by the Le Bail analyses using the Cu  $K\alpha$  X-ray powder diffraction data measured at 23 °C.

| $x$  | $a$ (Å)     | $b$ (Å)     | $c$ (Å)   | Lattice volume (Å <sup>3</sup> ) |
|------|-------------|-------------|-----------|----------------------------------|
| 0    | 4.0592(7)   | 17.524(3)   | 5.9791(5) | 425.32(10)                       |
| 0.05 | 4.0612(3)   | 17.5388(10) | 5.9708(4) | 425.29(4)                        |
| 0.1  | 4.0616(5)   | 17.522(3)   | 5.9667(7) | 424.63(10)                       |
| 0.2  | 4.06274(15) | 17.5177(7)  | 5.9574(2) | 423.98(3)                        |
| 0.3  | 4.0670(7)   | 17.474(4)   | 5.9584(7) | 423.43(12)                       |
| 0.4  | 4.06777(8)  | 17.452(3)   | 5.9520(6) | 422.52(12)                       |
| 0.5  | 4.06643(10) | 17.429(5)   | 5.9526(8) | 421.88(16)                       |

**(D) UV–Vis diffuse reflectance spectra**

---

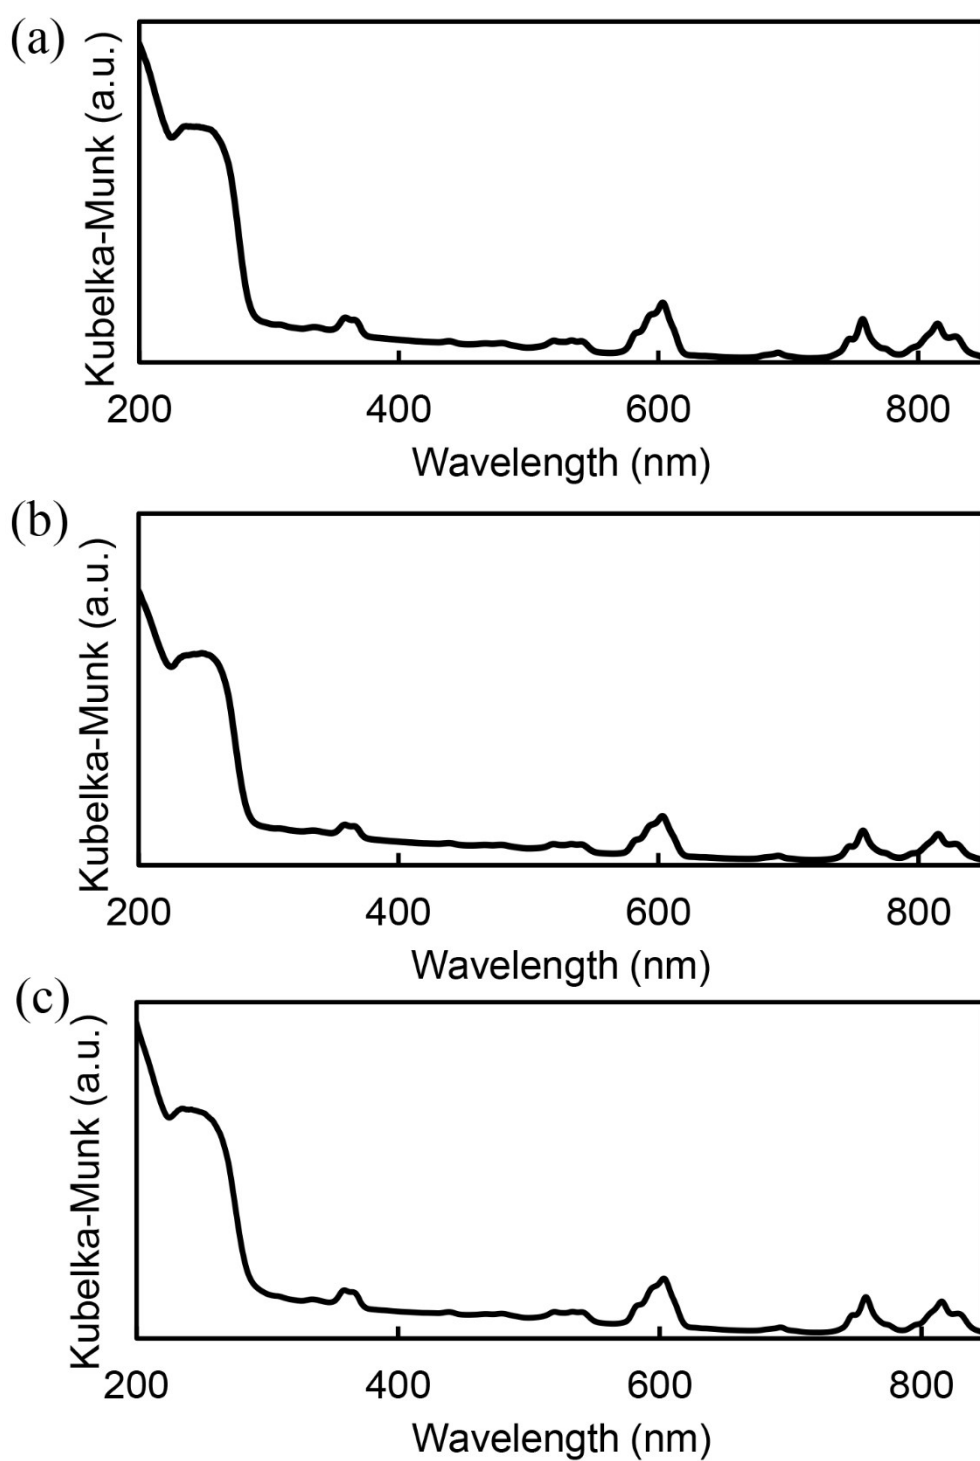

**Figure S4.** UV–Vis diffuse reflectance spectra of (a)  $\text{BaNdScO}_4$ , (b)  $\text{BaNd}_{0.9}\text{Ca}_{0.1}\text{ScO}_{3.95}$  and (c)  $\text{BaNd}_{0.8}\text{Ca}_{0.2}\text{ScO}_{3.9}$ .

### (E) Arrhenius plots of oxide-ion conductivities

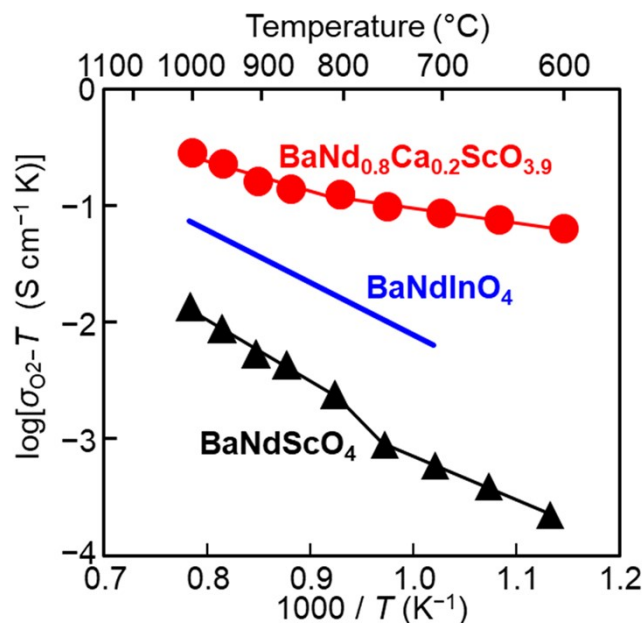

**Figure S5.** Arrhenius plots of oxide-ion conductivities  $\sigma_{O^{2-}}$  of BaNdScO<sub>4</sub> (black), BaNd<sub>0.8</sub>Ca<sub>0.2</sub>ScO<sub>3.9</sub> (red) and BaNdInO<sub>4</sub> (blue). The activation energies of  $\sigma_{O^{2-}}$  of BaNdScO<sub>4</sub> were 0.92(12) eV in the temperature range of 600–800 °C and 1.04(5) eV above 800 °C. These values are higher than those of BaNd<sub>0.8</sub>Ca<sub>0.2</sub>ScO<sub>3.9</sub> (0.25(2) eV in the temperature range of 600–800 °C and 0.51(8) eV above 800 °C) and seem to be higher than that of BaNdInO<sub>4</sub> in the temperature range of 700–1000 °C (0.89(4) eV) (*J. Electrochem. Soc.*, 2017, **164**, F1392–F1399). Higher activation energy for oxide-ion conductivity of BaNdScO<sub>4</sub> ( $E_a = 1.04$  eV above 800°C) than that of BaNdInO<sub>4</sub> ( $E_a = 0.89$  eV) is consistent with the higher bond-valence-based energy (BVE) barrier for oxide-ion migration of BaNdScO<sub>4</sub> (1.97 eV) than that of BaNdInO<sub>4</sub> (0.77 eV), which is attributable to the smaller bottleneck size (critical radius) for oxide-ion migration of BaNdScO<sub>4</sub> 1.0377(7) Å than that of BaNdInO<sub>4</sub> 1.0666(2) Å (*Chem. Mater.*, 2014, **26**, 2488–2491).

## (F) Proton transport number

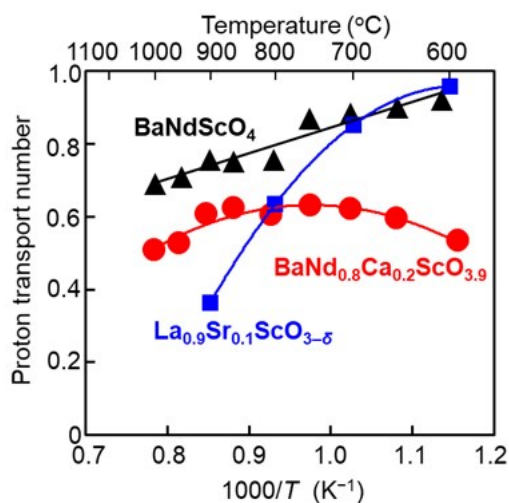

**Figure S6.** Proton transport numbers of BaNdScO<sub>4</sub> (this work), BaNd<sub>0.8</sub>Ca<sub>0.2</sub>ScO<sub>3.9</sub> (this work) and La<sub>0.9</sub>Sr<sub>0.1</sub>ScO<sub>3-δ</sub> (*Solid State Ionics*, 2017, **306**, 126–136).

**Table S2.** Proton transport numbers of BaNdScO<sub>4</sub> (this work), BaNd<sub>0.8</sub>Ca<sub>0.2</sub>ScO<sub>3.9</sub> (this work) and La<sub>0.9</sub>Sr<sub>0.1</sub>ScO<sub>3-δ</sub> (*Solid State Ionics*, 2017, **306**, 126–136). The proton transport number of BaNdScO<sub>4</sub> is comparable with that of La<sub>0.9</sub>Sr<sub>0.1</sub>ScO<sub>3-δ</sub> at 600 and 700 °C, while the proton transport number of BaNdScO<sub>4</sub> is higher than that of La<sub>0.9</sub>Sr<sub>0.1</sub>ScO<sub>3-δ</sub> at 800 and 900 °C.

| Composition                                              | 600 °C | 700 °C | 800 °C | 900 °C | 1000 °C |
|----------------------------------------------------------|--------|--------|--------|--------|---------|
| BaNdScO <sub>4</sub>                                     | 0.92   | 0.88   | 0.76   | 0.76   | 0.69    |
| BaNd <sub>0.8</sub> Ca <sub>0.2</sub> ScO <sub>3.9</sub> | 0.53   | 0.62   | 0.61   | 0.61   | 0.51    |
| La <sub>0.9</sub> Sr <sub>0.1</sub> ScO <sub>3-δ</sub>   | 0.96   | 0.85   | 0.63   | 0.36   | —       |

### (G) TG-MS data and water content $y$ of $\text{BaNd}_{0.8}\text{Ca}_{0.2}\text{ScO}_{3.9}\cdot y\text{H}_2\text{O}$

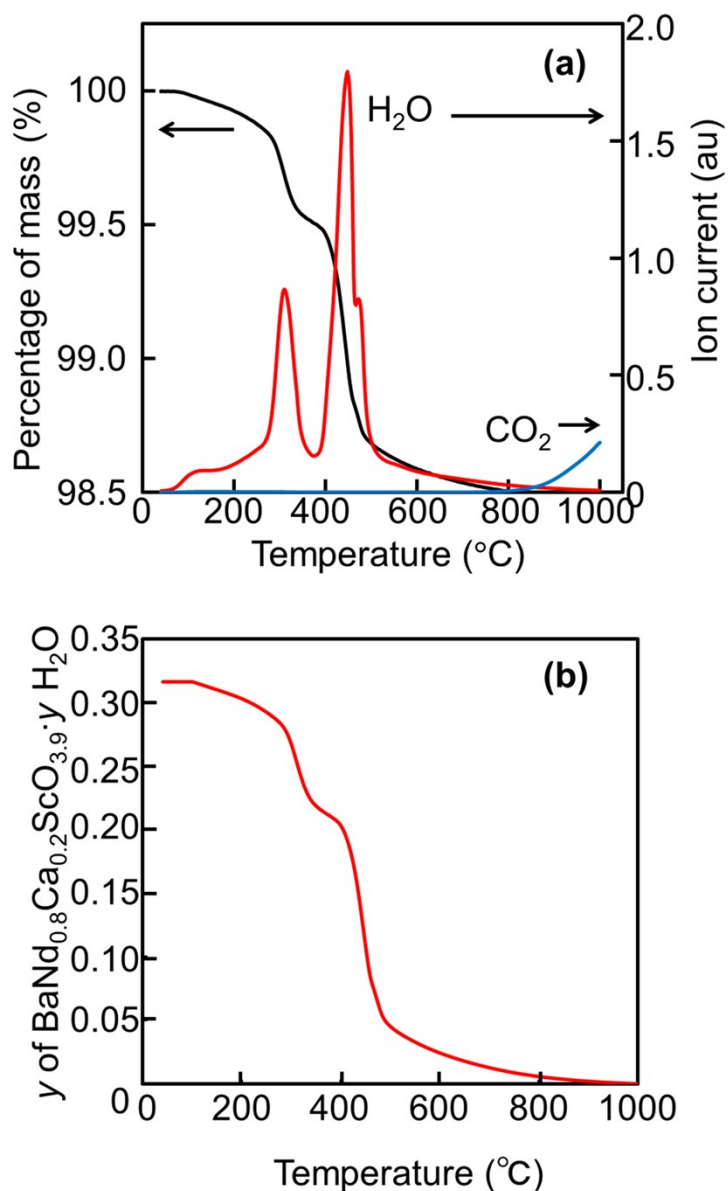

**Figure S7.** (a) Thermogravimetric-mass spectroscopy (TG-MS) curves of  $\text{BaNd}_{0.8}\text{Ca}_{0.2}\text{ScO}_{3.9}$  sample annealed in wet air [ $\text{BaNd}_{0.8}\text{Ca}_{0.2}\text{ScO}_{3.934(2)}\text{H}_{0.067(3)}\cdot 0.283\text{H}_2\text{O}$ ]. Black TG curve and ion currents of  $\text{H}_2\text{O}$  (red) and  $\text{CO}_2$  (blue). (b) Water content  $y$  in  $\text{BaNd}_{0.8}\text{Ca}_{0.2}\text{ScO}_{3.9}\cdot y\text{H}_2\text{O}$  obtained using the MS curve.

## (H) Results of the structure refinements of BaNd<sub>0.8</sub>Ca<sub>0.2</sub>ScO<sub>3.9</sub> sample annealed in wet air

**Table S3.** Results of the structure refinements of neutron powder diffraction (NPD) data of BaNd<sub>0.8</sub>Ca<sub>0.2</sub>ScO<sub>3.9</sub> sample annealed in wet air [BaNd<sub>0.8</sub>Ca<sub>0.2</sub>ScO<sub>3.934(2)</sub>H<sub>0.067(3)</sub>·0.283 H<sub>2</sub>O] based on eighteen structural models where the positions of H atom are different from each other. For the structure refinements based on the Models 2-18, the atomic coordinates of H atom were fixed. Model 1 gave the best results with lowest  $R$  factors. Reliability factors for the structural model without H atom were  $R_{wp} = 0.0384$  and  $R_F = 0.0264$ .

| Model No. | Atomic coordinates of H atom |           |            | Reliability factors |        |        |
|-----------|------------------------------|-----------|------------|---------------------|--------|--------|
|           | $x$                          | $y$       | $z$        | $R_{wp}$            | $R_F$  | $R_B$  |
| 1         | 0                            | 0.1614(7) | 0.8254(17) | 0.0381              | 0.0262 | 0.0389 |
| 2         | 0.165                        | 0.14      | 0.615      | 0.0390              | 0.0267 | 0.0411 |
| 3         | 0.88                         | 0.21      | 0.605      | 0.0388              | 0.0266 | 0.0425 |
| 4         | 0.17                         | 0.14      | 0.46       | 0.0393              | 0.0271 | 0.0435 |
| 5         | 0.17                         | 0.23      | 0.46       | 0.0392              | 0.0267 | 0.0449 |
| 6         | 0.17                         | 0.2       | -0.1       | 0.0389              | 0.0270 | 0.0421 |
| 7         | 0                            | 0.21      | 0.18       | 0.0387              | 0.0270 | 0.0394 |
| 8         | 0                            | 0.155     | 0.75       | 0.0381              | 0.0264 | 0.0392 |
| 9         | 0                            | 0.31      | 0.25       | 0.0382              | 0.0263 | 0.0400 |
| 10        | 0                            | 0.115     | 0.52       | 0.0392              | 0.0267 | 0.0438 |
| 11        | 0                            | 0.2       | 0.65       | 0.0386              | 0.0266 | 0.0414 |
| 12        | 0.35                         | 0.12      | 0.38       | 0.0389              | 0.0269 | 0.0397 |
| 13        | 0.35                         | 0.09      | 0.38       | 0.0393              | 0.0271 | 0.0413 |
| 14        | 0.35                         | 0.055     | 0.38       | 0.0387              | 0.0269 | 0.0386 |
| 15        | 0.26                         | 0.5       | 0.5        | 0.0390              | 0.0271 | 0.0416 |
| 16        | 0.5                          | 0.56      | 0.5        | 0.0387              | 0.0267 | 0.0425 |
| 17        | 0.5                          | 0.5       | 0.32       | 0.0386              | 0.0266 | 0.0411 |
| 18        | 0.5                          | 0.455     | 0.355      | 0.0383              | 0.0265 | 0.0372 |

**(I) Rietveld pattern of neutron powder diffraction data of  $\text{BaNd}_{0.8}\text{Ca}_{0.2}\text{ScO}_{3.9}$  sample annealed in wet air**

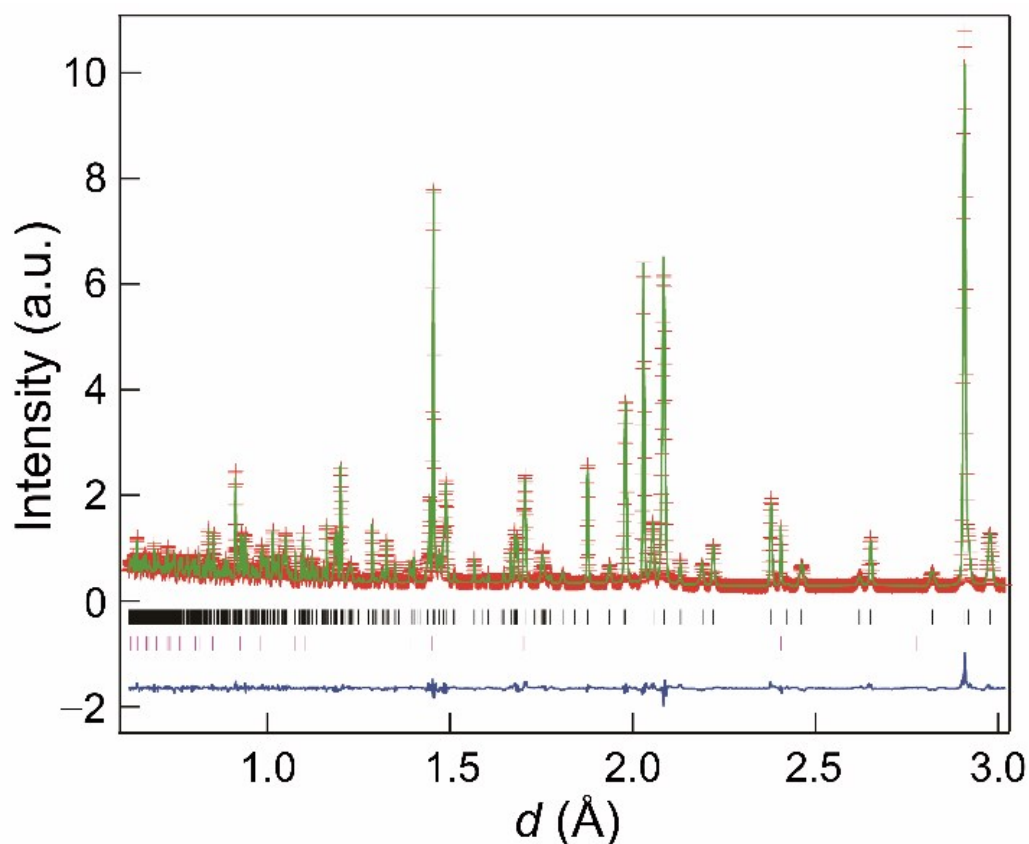

**Figure S8.** Rietveld pattern of neutron powder diffraction data of  $\text{BaNd}_{0.8}\text{Ca}_{0.2}\text{ScO}_{3.9}$  sample annealed in wet air [ $\text{BaNd}_{0.8}\text{Ca}_{0.2}\text{ScO}_{3.934(2)}\text{H}_{0.067(3)}$ ] measured at 25 °C. The observed and calculated intensities and difference plot are shown by red + marks, green solid line, and blue solid line, respectively. Black and purple tick marks stand for the calculated Bragg peak positions of orthorhombic  $\text{BaNd}_{0.8}\text{Ca}_{0.2}\text{ScO}_{3.934(2)}\text{H}_{0.067(3)}$  and cubic CaO, respectively.

## **(J) Structural models of $\text{Ba}_{20}\text{Nd}_{16}\text{Ca}_2\text{Sc}_{20}\text{O}_{80}\text{H}_8$ for DFT calculations**

**Table S4.** Energies of  $\text{Ba}_{20}\text{Nd}_{16}\text{Ca}_2\text{Sc}_{20}\text{O}_{80}\text{H}_8$  for fifteen structural models, which were obtained by the DFT structural optimizations. Model A–1 is most stable.

| Position of<br>Ca atom* | Structural<br>models | Position of<br>H atom** | Energy (eV) | Energy<br>(meV / atom) |
|-------------------------|----------------------|-------------------------|-------------|------------------------|
| model A                 | A–1                  | near O3                 | 0           | 0                      |
|                         | A–2                  | near O2                 | 6.872564    | 47.07236               |
|                         | A–3                  | near O1                 | 2.229383    | 15.26975               |
| model B                 | B–1                  | near O3                 | 2.926438    | 20.04410               |
|                         | B–2                  | near O2                 | 8.082557    | 55.35998               |
|                         | B–3                  | near O1                 | 4.192992    | 28.71912               |
| model C                 | C–1                  | near O3                 | 2.171961    | 14.87645               |
|                         | C–2                  | near O2                 | 10.606299   | 72.64588               |
|                         | C–3                  | near O1                 | 5.210950    | 35.69144               |
| model D                 | D–1                  | near O3                 | 2.517771    | 17.24501               |
|                         | D–2                  | near O2                 | 8.868790    | 60.74514               |
|                         | D–3                  | near O1                 | 5.454241    | 37.35782               |
| model E                 | E–1                  | near O3                 | 2.201178    | 15.07656               |
|                         | E–2                  | near O2                 | 8.348209    | 57.17951               |
|                         | E–3                  | near O1                 | 4.713434    | 32.28379               |

\* In the model A, all Ca atoms occupy the Nd sites. In the models B, C, D and E, all Ca atoms occupy the Ba sites, four Ba atoms are located at Nd sites and the oxygen vacancies exist at different positions depending on the model.

\*\* See the Table 1 for the atom labels and positions of O1, O2 and O3 atoms.

**Table S5.** Optimized positional parameters of Ba<sub>20</sub>Nd<sub>16</sub>Ca<sub>2</sub>Sc<sub>20</sub>O<sub>80</sub>H<sub>8</sub> for the most stable model A-1, which were obtained by the DFT structural optimization (space group *P1*). Optimized lattice parameters *a*, *b*, *c*,  $\alpha$ ,  $\beta$  and  $\gamma$  are 4.09358 Å, 17.84825 Å, 29.94585 Å, 89.64°, 90° and 90°, respectively. The optimized lattice parameters and average atomic coordinates agree well with experimental ones in Table 1.

| atom<br>coordinates | x   | y      | z      |    | x   | y       | z       |    | x   | y      | z       |    | x   | y      | z      |
|---------------------|-----|--------|--------|----|-----|---------|---------|----|-----|--------|---------|----|-----|--------|--------|
| Ba                  | 0   | 0.4097 | 0.053  | Sc | 0   | 0.0769  | 0.0483  | O1 | 0.5 | 0.4929 | -0.001  | O3 | 0   | 0.19   | 0.5021 |
| Ba                  | 0   | 0.5609 | 0.1423 | Sc | 0   | 0.9123  | 0.1458  | O1 | 0.5 | 0.4926 | 0.9019  | O3 | 0   | 0.8187 | 0.4996 |
| Ba                  | 0.5 | 0.9181 | 0.0449 | Sc | 0.5 | 0.5707  | 0.0482  | O2 | 0   | 0.5832 | 0.049   | O3 | 0   | 0.829  | 0.3952 |
| Ba                  | 0.5 | 0.0731 | 0.1401 | Sc | 0.5 | 0.3946  | 0.1452  | O2 | 0   | 0.4172 | 0.1511  | O3 | 0   | 0.1848 | 0.4079 |
| Ba                  | 0   | 0.4253 | 0.2385 | Sc | 0   | 0.0776  | 0.2404  | O2 | 0.5 | 0.0793 | 0.0467  | O3 | 0.5 | 0.6847 | 0.4929 |
| Ba                  | 0   | 0.5663 | 0.3501 | Sc | 0   | 0.9341  | 0.3461  | O2 | 0.5 | 0.9068 | 0.1498  | O3 | 0.5 | 0.3287 | 0.5052 |
| Ba                  | 0.5 | 0.916  | 0.2415 | Sc | 0.5 | 0.5797  | 0.2556  | O2 | 0   | 0.5973 | 0.2623  | O3 | 0.5 | 0.3327 | 0.5968 |
| Ba                  | 0.5 | 0.0823 | 0.3557 | Sc | 0.5 | 0.4152  | 0.35    | O2 | 0   | 0.409  | 0.3556  | O3 | 0.5 | 0.6904 | 0.3987 |
| Ba                  | 0   | 0.4272 | 0.4501 | Sc | 0   | 0.0838  | 0.4524  | O2 | 0.5 | 0.0953 | 0.2413  | O3 | 0   | 0.1846 | 0.6904 |
| Ba                  | 0   | 0.5817 | 0.5445 | Sc | 0   | 0.9152  | 0.5509  | O2 | 0.5 | 0.9281 | 0.3501  | O3 | 0   | 0.8394 | 0.6923 |
| Ba                  | 0.5 | 0.9273 | 0.4507 | Sc | 0.5 | 0.584   | 0.4478  | O2 | 0   | 0.5931 | 0.4472  | O3 | 0   | 0.8076 | 0.5904 |
| Ba                  | 0.5 | 0.0664 | 0.5505 | Sc | 0.5 | 0.4334  | 0.5544  | O2 | 0   | 0.4274 | 0.5505  | O3 | 0   | 0.1865 | 0.5962 |
| Ba                  | 0   | 0.4163 | 0.6587 | Sc | 0   | 0.0786  | 0.6451  | O2 | 0.5 | 0.0929 | 0.4535  | O3 | 0.5 | 0.6889 | 0.6974 |
| Ba                  | 0   | 0.5737 | 0.7595 | Sc | 0   | 0.8953  | 0.7548  | O2 | 0.5 | 0.9088 | 0.5452  | O3 | 0.5 | 0.3156 | 0.7023 |
| Ba                  | 0.5 | 0.9244 | 0.6618 | Sc | 0.5 | 0.5773  | 0.6594  | O2 | 0   | 0.5947 | 0.6585  | O3 | 0.5 | 0.3108 | 0.7946 |
| Ba                  | 0.5 | 0.0607 | 0.7572 | Sc | 0.5 | 0.4124  | 0.7546  | O2 | 0   | 0.4066 | 0.7504  | O3 | 0.5 | 0.6836 | 0.6046 |
| Ba                  | 0   | 0.4183 | 0.8553 | Sc | 0   | 0.0711  | 0.8512  | O2 | 0.5 | 0.0962 | 0.639   | O3 | 0   | 0.1765 | 0.896  |
| Ba                  | 0   | 0.5653 | 0.9507 | Sc | 0   | 0.9093  | 0.949   | O2 | 0.5 | 0.9172 | 0.7493  | O3 | 0   | 0.8043 | 0.9064 |
| Ba                  | 0.5 | 0.9101 | 0.8472 | Sc | 0.5 | 0.5772  | 0.8511  | O2 | 0   | 0.5796 | 0.8529  | O3 | 0   | 0.8275 | 0.8069 |
| Ba                  | 0.5 | 0.0651 | 0.9487 | Sc | 0.5 | 0.4093  | 0.9513  | O2 | 0   | 0.4024 | 0.9506  | O3 | 0   | 0.1775 | 0.8015 |
| Nd                  | 0   | 0.7167 | 0.0498 | O1 | 0   | -0.0076 | -0.0021 | O2 | 0.5 | 0.0834 | 0.851   | O3 | 0.5 | 0.681  | 0.8902 |
| Nd                  | 0.5 | 0.2191 | 0.0542 | O1 | 0   | 0.9895  | 0.097   | O2 | 0.5 | 0.902  | 0.9493  | O3 | 0.5 | 0.3128 | 0.9021 |
| Nd                  | 0.5 | 0.774  | 0.1487 | O1 | 0.5 | 0.5229  | 0.2007  | O3 | 0   | 0.1579 | 0.1019  | O3 | 0.5 | 0.305  | 0.994  |
| Nd                  | 0   | 0.2781 | 0.3541 | O1 | 0.5 | 0.4937  | 0.0986  | O3 | 0   | 0.8108 | 0.1058  | O3 | 0.5 | 0.6582 | 0.7972 |
| Nd                  | 0.5 | 0.2334 | 0.2445 | O1 | 0   | -0.0074 | 0.1996  | O3 | 0   | 0.8129 | -0.0017 | H  | 0.5 | 0.6393 | 0.1913 |
| Nd                  | 0.5 | 0.797  | 0.3505 | O1 | 0   | 0.0263  | 0.3032  | O3 | 0   | 0.181  | 0.0094  | H  | 0.5 | 0.6698 | 0.3354 |
| Nd                  | 0   | 0.7281 | 0.4457 | O1 | 0.5 | 0.5     | 0.4005  | O3 | 0.5 | 0.6782 | 0.0984  | H  | 0.5 | 0.6956 | 0.7305 |
| Nd                  | 0   | 0.2963 | 0.5501 | O1 | 0.5 | 0.4971  | 0.3033  | O3 | 0.5 | 0.3264 | 0.0938  | H  | 0.5 | 0.6309 | 0.5941 |
| Nd                  | 0.5 | 0.2279 | 0.4552 | O1 | 0   | 0.0083  | 0.4009  | O3 | 0.5 | 0.3405 | 0.2085  | H  | 0   | 0.1397 | 0.7097 |
| Nd                  | 0.5 | 0.7782 | 0.5464 | O1 | 0   | -0.0002 | 0.5001  | O3 | 0.5 | 0.676  | 0.0039  | H  | 0   | 0.169  | 0.5647 |
| Nd                  | 0   | 0.7329 | 0.6563 | O1 | 0.5 | 0.5251  | 0.5971  | O3 | 0   | 0.1838 | 0.2961  | H  | 0   | 0.1981 | 0.1704 |
| Nd                  | 0   | 0.274  | 0.7512 | O1 | 0.5 | 0.5081  | 0.4995  | O3 | 0   | 0.8343 | 0.3036  | H  | 0   | 0.1303 | 0.3056 |
| Nd                  | 0   | 0.7195 | 0.846  | O1 | 0   | -0.0031 | 0.5973  | O3 | 0   | 0.8165 | 0.1981  |    |     |        |        |
| Nd                  | 0   | 0.2676 | 0.9516 | O1 | 0   | 0.0197  | 0.6998  | O3 | 0   | 0.1907 | 0.2033  |    |     |        |        |
| Nd                  | 0.5 | 0.2168 | 0.8506 | O1 | 0.5 | 0.4896  | 0.8029  | O3 | 0.5 | 0.6882 | 0.304   |    |     |        |        |
| Nd                  | 0.5 | 0.7674 | 0.9482 | O1 | 0.5 | 0.4918  | 0.7003  | O3 | 0.5 | 0.3078 | 0.3103  |    |     |        |        |
| Ca                  | 0   | 0.7271 | 0.2526 | O1 | 0   | -0.0056 | 0.8013  | O3 | 0.5 | 0.3186 | 0.401   |    |     |        |        |
| Ca                  | 0.5 | 0.2263 | 0.648  | O1 | 0   | -0.0071 | 0.9009  | O3 | 0.5 | 0.6851 | 0.2098  |    |     |        |        |

# **(K) Proton diffusion paths and their energy profiles in BaNdScO<sub>4</sub>H**

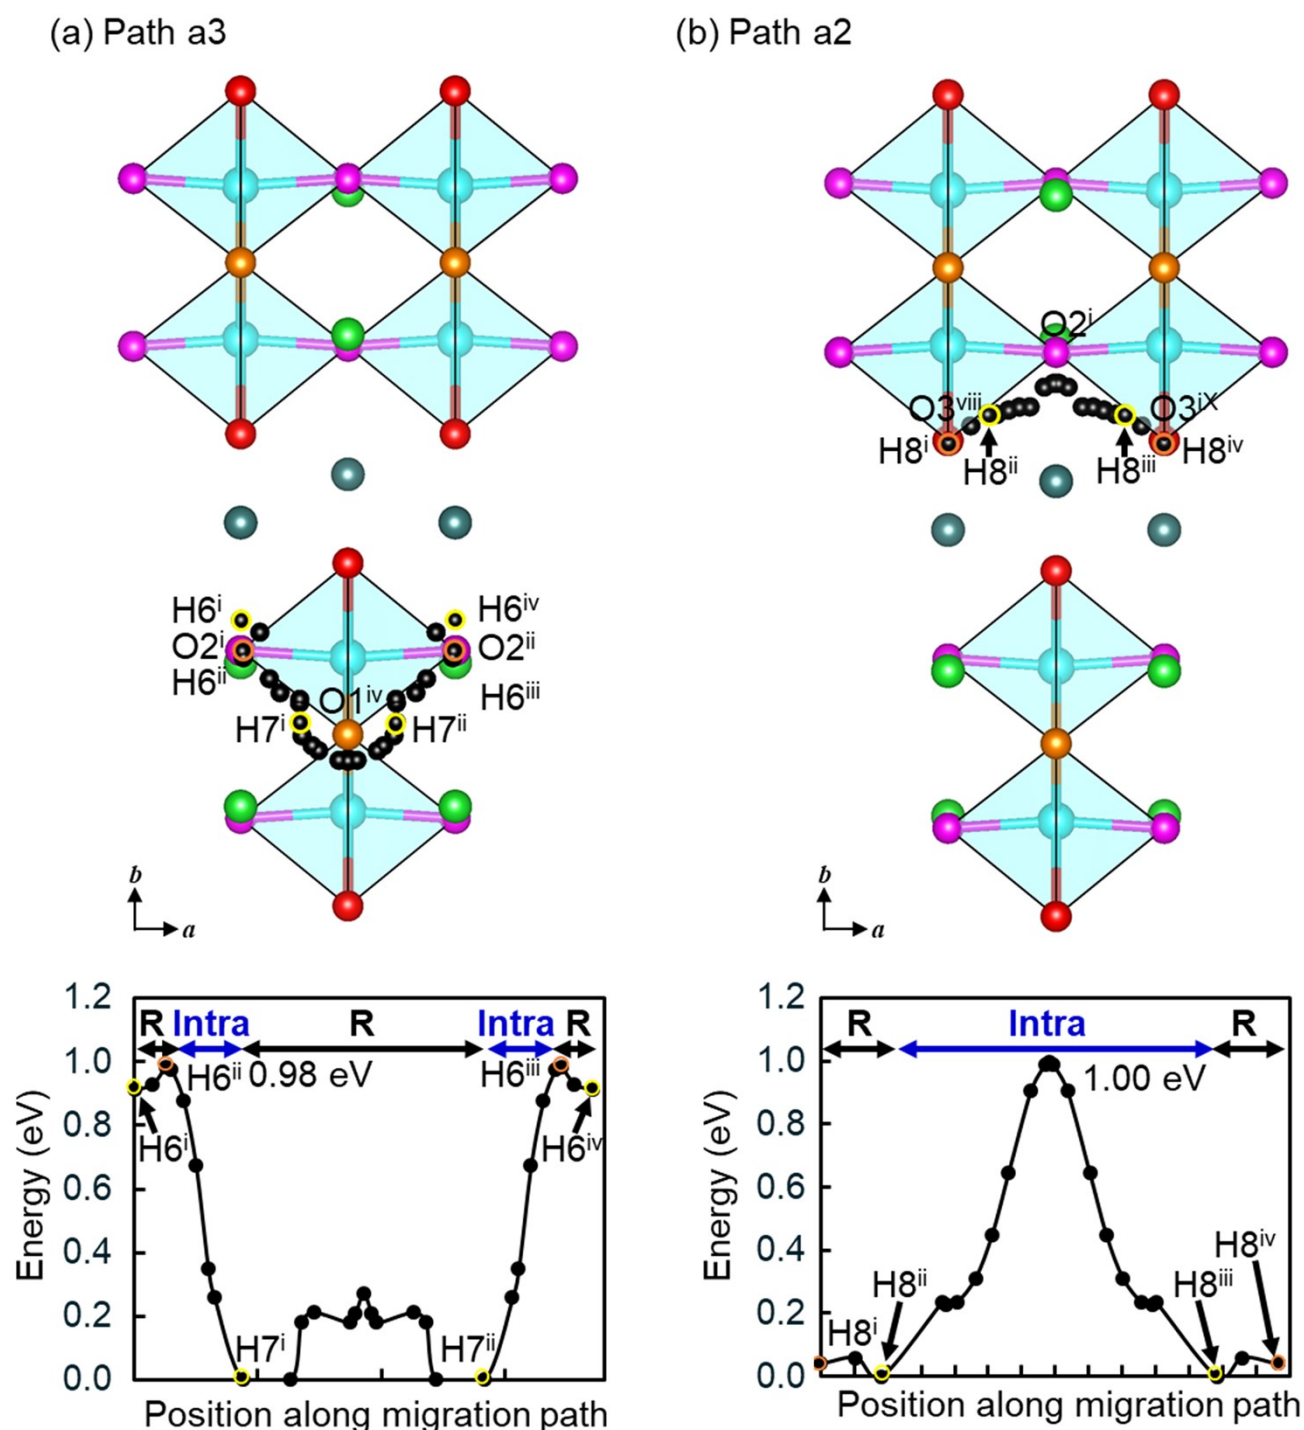

**Figure S9.** Proton migration pathways and their energy profiles in BaNdScO<sub>4</sub>H. (a) Path a3 along *a* axis, H6<sup>i</sup>(O2<sup>i</sup>)–H6<sup>ii</sup>(O2<sup>i</sup>)–H7<sup>i</sup>(O1<sup>iv</sup>)–H7<sup>ii</sup>(O1<sup>iv</sup>)–H6<sup>iii</sup>(O2<sup>ii</sup>)–H6<sup>iv</sup>(O2<sup>ii</sup>) and (b) Path a2 along *a* axis, H8<sup>i</sup>(O3<sup>viii</sup>)–H8<sup>ii</sup>(O3<sup>viii</sup>)–H8<sup>iii</sup>(O3<sup>ix</sup>)–H8<sup>iv</sup>(O3<sup>ix</sup>). See the details in Table 2.

**(L) Crystal structures, bond-valence-based energy landscapes and oxide-ion diffusion pathways in  $\text{BaNd}_{0.8}\text{Ca}_{0.2}\text{ScO}_{3.9}$**

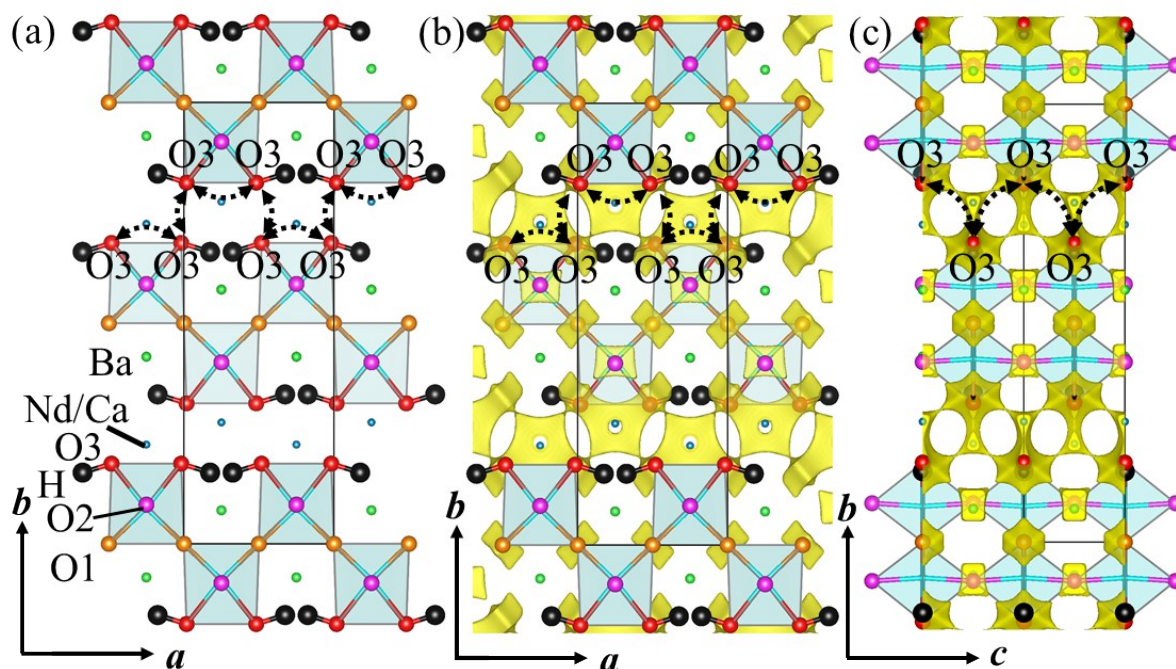

**Figure S10.** (a) Refined crystal structure and (b,c) bond valence-based energy (BVE) landscapes for an oxide-ion with yellow isosurfaces at 2.00 eV of  $\text{BaNd}_{0.8}\text{Ca}_{0.2}\text{ScO}_{3.934(2)}\text{H}_{0.067(3)}$  at 25 °C, which were depicted along (a,b)  $c$  and (c)  $a$  axes. The solid lines represent the unit cell. Orange, pink, red, dark blue, green and black spheres and light blue octahedra stand for O(O1), O(O2), O(O3), Nd/Ca, Ba, H atoms and  $\text{ScO}_6$  octahedra, respectively. In panels (b) and (c), the most stable position at O3 site was set to 0 eV. Dotted lines with arrows show possible oxide-ion diffusion pathways.

End of Electronic Supplementary Information.
